# Supplementary material
Source: MDPI journal article supplement (https://www.mdpi.com/2077-0472/12/5/603)
Supplement: s1 [file s1]

**Table S1. Three-way ANOVA of priming treatments on the 7th days germination percentage for three pepper varieties in different storage conditions**

| Storage period | Source                                                    | SS     | df | MS     | F        | P-value                |
|----------------|-----------------------------------------------------------|--------|----|--------|----------|------------------------|
| 2 months       | Varieties                                                 | 0.6976 | 2  | 0.3488 | 90.66**  | $5.00 \times 10^{-17}$ |
|                | Treatments                                                | 0.0523 | 2  | 0.0262 | 6.80**   | $2.50 \times 10^{-3}$  |
|                | Storage conditions                                        | 0.0197 | 2  | 0.0099 | 2.57     | 0.087                  |
|                | Varieties $\times$ Treatments                             | 0.1071 | 4  | 0.0268 | 6.96**   | $1.67 \times 10^{-4}$  |
|                | Varieties $\times$ Storage conditions                     | 0.0320 | 4  | 0.0080 | 2.08     | 0.098                  |
|                | Treatments $\times$ Storage conditions                    | 0.0631 | 4  | 0.0158 | 4.10**   | $6.12 \times 10^{-3}$  |
|                | Varieties $\times$ Treatments $\times$ Storage conditions | 0.1248 | 8  | 0.0156 | 4.05**   | $9.58 \times 10^{-4}$  |
|                | Error                                                     | 0.1847 | 48 | 0.0038 |          |                        |
| 4 months       | Varieties                                                 | 1.2792 | 2  | 0.6396 | 165.31** | $2.91 \times 10^{-23}$ |
|                | Treatments                                                | 0.0230 | 2  | 0.0115 | 2.97     | 0.060                  |
|                | Storage conditions                                        | 0.0073 | 2  | 0.0037 | 0.94     | 0.396                  |
|                | Varieties $\times$ Treatments                             | 0.0621 | 4  | 0.0155 | 4.01**   | $6.54 \times 10^{-3}$  |
|                | Varieties $\times$ Storage conditions                     | 0.0077 | 4  | 0.0019 | 0.50     | 0.739                  |
|                | Treatments $\times$ Storage conditions                    | 0.0327 | 4  | 0.0082 | 2.11     | 0.093                  |
|                | Varieties $\times$ Treatments $\times$ Storage conditions | 0.0546 | 8  | 0.0068 | 1.77     | 0.105                  |
|                | Error                                                     | 0.2012 | 52 | 0.0039 |          |                        |
| 6 months       | Varieties                                                 | 0.9737 | 2  | 0.4868 | 158.11** | $7.54 \times 10^{-22}$ |

|                 |                                                                                        |        |    |        |          |                        |
|-----------------|----------------------------------------------------------------------------------------|--------|----|--------|----------|------------------------|
|                 | <b>Treatments</b>                                                                      | 0.2027 | 2  | 0.1013 | 32.91**  | $9.99 \times 10^{-10}$ |
|                 | <b>Storage conditions</b>                                                              | 0.0120 | 2  | 0.0060 | 1.95     | 0.153                  |
|                 | <b>Varieties <math>\times</math> Treatments</b>                                        | 0.1114 | 4  | 0.0279 | 9.05**   | $1.58 \times 10^{-5}$  |
|                 | <b>Varieties <math>\times</math> Storage conditions</b>                                | 0.0645 | 4  | 0.0161 | 5.23**   | $1.40 \times 10^{-3}$  |
|                 | <b>Treatments <math>\times</math> Storage conditions</b>                               | 0.2052 | 4  | 0.0513 | 16.66**  | $1.26 \times 10^{-8}$  |
|                 | <b>Varieties <math>\times</math> Treatments <math>\times</math> Storage conditions</b> | 0.2213 | 8  | 0.0277 | 8.98**   | $1.97 \times 10^{-7}$  |
|                 | <b>Error</b>                                                                           | 0.1478 | 48 | 0.0031 |          |                        |
| <b>8 months</b> | <b>Varieties</b>                                                                       | 0.4346 | 2  | 0.2173 | 91.50**  | $4.20 \times 10^{-17}$ |
|                 | <b>Treatments</b>                                                                      | 0.1468 | 2  | 0.0734 | 30.90**  | $2.37 \times 10^{-9}$  |
|                 | <b>Storage conditions</b>                                                              | 0.7721 | 2  | 0.3860 | 162.54** | $4.23 \times 10^{-22}$ |
|                 | <b>Varieties <math>\times</math> Treatments</b>                                        | 0.0584 | 4  | 0.0146 | 6.15**   | $4.43 \times 10^{-4}$  |
|                 | <b>Varieties <math>\times</math> Storage conditions</b>                                | 0.1480 | 4  | 0.0370 | 15.57**  | $3.10 \times 10^{-8}$  |
|                 | <b>Treatments <math>\times</math> Storage conditions</b>                               | 0.0471 | 4  | 0.0118 | 4.95**   | $2.00 \times 10^{-3}$  |
|                 | <b>Varieties <math>\times</math> Treatments <math>\times</math> Storage conditions</b> | 0.0898 | 8  | 0.0112 | 4.73**   | $2.56 \times 10^{-4}$  |
|                 | <b>Error</b>                                                                           | 0.1140 | 48 | 0.0024 |          |                        |

Notes: \* indicates significance at  $p < 0.05$ , \*\* indicates significance at  $p < 0.01$ .

**Table S2. The Tukey multiple comparison test result for the mean separations of 7th days germination percentage during the storage at the 0.05 level**

| <b>Factors</b>            | <b>Levels</b>              | <b>2 months</b> | <b>4 months</b> | <b>6 months</b> | <b>8 months</b> |
|---------------------------|----------------------------|-----------------|-----------------|-----------------|-----------------|
| <b>Varieties</b>          | <b>No.63</b>               | 72.5 a          | 78.2 a          | 74.7 a          | 11.3 b          |
|                           | <b>No.73</b>               | 50.2 c          | 48.3 c          | 44.8 c          | 10.4 b          |
|                           | <b>No.101</b>              | 56.7 b          | 57.8 b          | 55.9 b          | 27.8 a          |
| <b>Treatments</b>         | <b>KNO<sub>3</sub></b>     | 61.9 a          | 63.4 a          | 64.7 a          | 23.0 a          |
|                           | <b>PEG</b>                 | 57.3 b          | 61.1 a          | 52.4 c          | 12.3 b          |
|                           | <b>KNO<sub>3</sub>+PEG</b> | 59.4 ab         | 60.3 a          | 58.2 b          | 14.9 b          |
| <b>Storage conditions</b> | <b>Plastic bag (25°C)</b>  | 59.9 ab         | 62.5 a          | 60.1 a          | 17.4 b          |
|                           | <b>Paper bag (25°C)</b>    | 56.3 b          | 61.1 a          | 57.3 a          | 3.5 c           |
|                           | <b>Plastic bag (-4°C)</b>  | 62.2 a          | 61.4 a          | 57.7 a          | 29.1 a          |

Notes: Means associated with different letters in each column are significantly different.

**Table S3. Three-way ANOVA of priming treatments on the final germination percentage for three pepper varieties in different storage conditions**

| Storage period  | Source                                                                                 | SS       | df      | MS   | F        | P-value                |
|-----------------|----------------------------------------------------------------------------------------|----------|---------|------|----------|------------------------|
| <b>2 months</b> | <b>Varieties</b>                                                                       | 0.70948  | 2.0000  | 0.35 | 96.48**  | $2.16 \times 10^{-18}$ |
|                 | <b>Treatments</b>                                                                      | 0.063738 | 2.0000  | 0.03 | 8.67**   | 0.554                  |
|                 | <b>Storage conditions</b>                                                              | 0.00463  | 2.0000  | 0.00 | 0.6296   | 0.537                  |
|                 | <b>Varieties <math>\times</math> Treatments</b>                                        | 0.023591 | 4.0000  | 0.01 | 1.6040   | 0.187                  |
|                 | <b>Varieties <math>\times</math> Storage conditions</b>                                | 0.007915 | 4.0000  | 0.00 | 0.5382   | 0.708                  |
|                 | <b>Treatments <math>\times</math> Storage conditions</b>                               | 0.007566 | 4.0000  | 0.00 | 0.5145   | 0.725                  |
|                 | <b>Varieties <math>\times</math> Treatments <math>\times</math> Storage conditions</b> | 0.062186 | 8.0000  | 0.01 | 2.1142   | 0.051                  |
|                 | <b>Error</b>                                                                           | 0.194867 | 53.0000 | 0.00 |          |                        |
| <b>4 months</b> | <b>Varieties</b>                                                                       | 0.830045 | 2.0000  | 0.42 | 147.19** | $6.55 \times 10^{-22}$ |
|                 | <b>Treatments</b>                                                                      | 0.018637 | 2.0000  | 0.01 | 3.30*    | 0.045                  |
|                 | <b>Storage conditions</b>                                                              | 0.006114 | 2.0000  | 0.00 | 1.0842   | 0.346                  |
|                 | <b>Varieties <math>\times</math> Treatments</b>                                        | 0.098542 | 4.0000  | 0.02 | 8.74**   | $1.89 \times 10^{-5}$  |
|                 | <b>Varieties <math>\times</math> Storage conditions</b>                                | 0.011197 | 4.0000  | 0.00 | 0.9928   | 0.420                  |
|                 | <b>Treatments <math>\times</math> Storage conditions</b>                               | 0.022144 | 4.0000  | 0.01 | 1.9634   | 0.114                  |
|                 | <b>Varieties <math>\times</math> Treatments <math>\times</math> Storage conditions</b> | 0.03713  | 8.0000  | 0.00 | 1.6461   | 0.135                  |
|                 | <b>Error</b>                                                                           | 0.1438   | 51.0000 | 0.00 |          |                        |
| <b>6 months</b> | <b>Varieties</b>                                                                       | 0.91661  | 2.0000  | 0.46 | 126.34** | $6.82 \times 10^{-21}$ |
|                 | <b>Treatments</b>                                                                      | 0.016543 | 2.0000  | 0.01 | 2.2801   | 0.112                  |
|                 | <b>Storage conditions</b>                                                              | 0.000602 | 2.0000  | 0.00 | 0.0830   | 0.920                  |
|                 | <b>Varieties <math>\times</math> Treatments</b>                                        | 0.018685 | 4.0000  | 0.00 | 1.2877   | 0.287                  |

|                 |                                                    |          |         |      |         |                        |
|-----------------|----------------------------------------------------|----------|---------|------|---------|------------------------|
| <b>8 months</b> | <b>Varieties × Storage conditions</b>              | 0.01886  | 4.0000  | 0.00 | 1.2997  | 0.282                  |
|                 | <b>Treatments × Storage conditions</b>             | 0.025382 | 4.0000  | 0.01 | 1.7492  | 0.153                  |
|                 | <b>Varieties × Treatments × Storage conditions</b> | 0.037335 | 8.0000  | 0.00 | 1.2865  | 0.271                  |
|                 | <b>Error</b>                                       | 0.192267 | 53.0000 | 0.00 |         |                        |
|                 | <b>Varieties</b>                                   | 0.390327 | 2.0000  | 0.20 | 44.74** | $3.91 \times 10^{-11}$ |
|                 | <b>Treatments</b>                                  | 0.080226 | 2.0000  | 0.04 | 9.20**  | $4.87 \times 10^{-4}$  |
|                 | <b>Storage conditions</b>                          | 0.581511 | 2.0000  | 0.29 | 66.66** | $9.29 \times 10^{-14}$ |
|                 | <b>Varieties × Treatments</b>                      | 0.284139 | 4.0000  | 0.07 | 16.29** | $3.96 \times 10^{-8}$  |
|                 | <b>Varieties × Storage conditions</b>              | 0.560256 | 4.0000  | 0.14 | 32.11** | $2.83 \times 10^{-12}$ |
|                 | <b>Treatments × Storage conditions</b>             | 0.215354 | 4.0000  | 0.05 | 12.34** | $1.01 \times 10^{-6}$  |
|                 | <b>Varieties × Treatments × Storage conditions</b> | 0.599316 | 8.0000  | 0.07 | 17.17** | $5.43 \times 10^{-11}$ |
|                 | <b>Error</b>                                       | 0.1832   | 42.0000 | 0.00 |         |                        |

Notes: \* indicates significance at  $p < 0.05$ , \*\* indicates significance at  $p < 0.01$ .

**Table S4. The Tukey multiple comparison test result for the mean separations of germination percentage during the storage at the 0.05 level**

| <b>Factors</b>    | <b>Levels</b>              | <b>2 months</b> | <b>4 months</b> | <b>6 months</b> | <b>8 months</b> |
|-------------------|----------------------------|-----------------|-----------------|-----------------|-----------------|
| <b>Varieties</b>  | <b>No.63</b>               | 83.7 a          | 84.2 a          | 82.5 a          | 48.1 b          |
|                   | <b>No.73</b>               | 63.9 b          | 63.8 b          | 59.8 b          | 57.1 a          |
|                   | <b>No.101</b>              | 63.5 b          | 61.5 b          | 60.3 b          | 40.4 c          |
| <b>Treatments</b> | <b>KNO<sub>3</sub></b>     | 68.9 b          | 70.1 a          | 69.4 a          | 45.8 b          |
|                   | <b>PEG</b>                 | 74.7 a          | 71.0 a          | 66.7 a          | 50.1 ab         |
|                   | <b>KNO<sub>3</sub>+PEG</b> | 67.9 b          | 68.2 a          | 66.7 a          | 51.8 a          |

|                    |                    |        |        |        |        |
|--------------------|--------------------|--------|--------|--------|--------|
| Storage conditions | Plastic bag (25°C) | 71.3 a | 71.7 a | 67.7 a | 53.0 b |
|                    | Paper bag (25°C)   | 69.5 a | 70.1 a | 67.5 a | 34.8 c |
|                    | Plastic bag (-4°C) | 70.5 a | 68.5 a | 67.7 a | 58.6 a |

Notes: Means associated with different letters in each column are significantly different.

**Table S5. Different growth indexes of primed pepper seeds in different storage conditions over time**

| Indexes    | Varieties | Storage period<br>(months) | KNO <sub>3</sub> priming |                     |                       | PEG priming           |                     |                       | KNO <sub>3</sub> and PEG priming |                     |                       |
|------------|-----------|----------------------------|--------------------------|---------------------|-----------------------|-----------------------|---------------------|-----------------------|----------------------------------|---------------------|-----------------------|
|            |           |                            | Plastic bag<br>(25°C)    | Paper bag<br>(25°C) | Plastic bag<br>(-4°C) | Plastic bag<br>(25°C) | Paper bag<br>(25°C) | Plastic bag<br>(-4°C) | Plastic bag<br>(25°C)            | Paper bag<br>(25°C) | Plastic bag<br>(-4°C) |
| 7th GP (%) | No.63     | 0                          | 81.3 a                   | 81.3 a              | 81.3 a                | 28.0 b                | 28.0 c              | 28.0 b                | 82.0 a                           | 82.0 a              | 82.0 a                |
|            |           | 2                          | 84.0 a                   | 87.0 a              | 76.7 a                | 66.0 a                | 45.3 b              | 79.3 a                | 75.3 a                           | 70.0 a              | 76.7 a                |
|            |           | 4                          | 81.3 a                   | 83.3 a              | 76.7 a                | 76.7 a                | 75.3 a              | 81.3 a                | 77.3 a                           | 78.0 a              | 74.0 a                |
|            |           | 6                          | 81.3 a                   | 81.3 a              | 86.7 a                | 75.3 a                | 77.0 a              | 27.0 b                | 71.3 a                           | 74.0 a              | 83.3 a                |
|            |           | 8                          | 2.0 b                    | 0 b                 | 40.0 b                | 2.7 c                 | 0 d                 | 19.3 b                | 9.0 b                            | 0 b                 | 34.0 b                |
|            | No.73     | 0                          | 58.0 a                   | 58.0 a              | 58.0 a                | 48.0 a                | 48.0 a              | 48.0 a                | 58.0 a                           | 58.0 a              | 58.0 a                |
|            |           | 2                          | 53.3 a                   | 48.0 a              | 55.3 a                | 46.7 a                | 55.3 a              | 50.0 a                | 48.7 a                           | 50.0 a              | 42.0 b                |
|            |           | 4                          | 56.0 a                   | 51.3 a              | 44.7 ab               | 46.7 a                | 54.7 a              | 53.3 a                | 44.7 a                           | 31.0 b              | 46.7 ab               |
|            |           | 6                          | 50.0 a                   | 51.3 a              | 48.7 ab               | 46.0 a                | 42.7 b              | 46.0 a                | 41.0 a                           | 33.3 b              | 42.0 b                |
|            |           | 8                          | 17.3 b                   | 2.7 b               | 36.0 b                | 10.0 b                | 0 c                 | 18.7 b                | 8.7 b                            | 1.33 c              | 7.33 c                |

|        |        |   |        |         |         |        |         |         |         |         |         |
|--------|--------|---|--------|---------|---------|--------|---------|---------|---------|---------|---------|
|        | No.101 | 0 | 63.3 a | 63.3 a  | 63.3 a  | 56.7 a | 56.7 a  | 56.7 a  | 55.3 a  | 55.3 a  | 55.3 a  |
|        |        | 2 | 59.3 a | 53.3 a  | 56.0 ab | 58.0 a | 51.0 a  | 64.0 a  | 56.0 a  | 59.3 a  | 54.0 a  |
|        |        | 4 | 62.7 a | 56.7 a  | 58.0 ab | 56.7 a | 48.7 a  | 56.7 a  | 59.0 a  | 60.7 a  | 61.3 a  |
|        |        | 6 | 56.7 a | 58.0 a  | 70.0 a  | 56.0 a | 52.7 a  | 46.7 ab | 58.7 a  | 52.0 a  | 57.3 a  |
|        |        | 8 | 39.3 b | 28.0 b  | 46.0 b  | 29.3 b | 6.0 b   | 31.0 b  | 35.3 b  | 0.7 b   | 36.0 b  |
| GP (%) | No.63  | 0 | 86.0 a | 86.0 a  | 86.0 a  | 84.0 a | 84.0 a  | 84.0 a  | 84.7 a  | 84.7 a  | 84.7 a  |
|        |        | 2 | 81.3 a | 88.0 a  | 82.7 a  | 86.7 a | 80.7 a  | 89.3 a  | 86.0 a  | 75.3 a  | 83.3 a  |
|        |        | 4 | 85.3 a | 85.3 a  | 84.0 a  | 85.3 a | 82.7 a  | 84.7 ab | 83.3 a  | 85.3 a  | 81.3 a  |
|        |        | 6 | 82.7 a | 82.7 a  | 87.3 a  | 83.3 a | 80.7 a  | 78.0 b  | 80.0 a  | 78.7 a  | 89.3 a  |
|        |        | 8 | 34 b   | 6.7 b   | 72.7 a  | 78.0 a | 11.3 b  | 90.0 a  | 34.0 b  | 59.0 b  | 65.3 b  |
|        | No.73  | 0 | 70.7 a | 70.7 a  | 70.7 a  | 69.3 a | 69.3 a  | 69.3 a  | 69.3 a  | 69.3 a  | 69.3 a  |
|        |        | 2 | 60.0 b | 54.7 b  | 66.0 a  | 71.3 a | 74.0 a  | 68.0 a  | 60.0 ab | 63.3 a  | 57.3 ab |
|        |        | 4 | 72.0 a | 65.0 ab | 54.7 bc | 68.0 a | 76.7 a  | 68.0 a  | 53.0 b  | 54.7 ab | 58.7 ab |
|        |        | 6 | 62.0 b | 63.3 ab | 60.7 ab | 59.3 a | 63.3 a  | 60.7 a  | 57.3 b  | 58.0 a  | 50.0 b  |
|        |        | 8 | 46.0 c | 5.0 c   | 49.0 c  | 40.0 b | 32.0 b  | 30.0 b  | 59.3 ab | 43.0 b  | 45.3 b  |
|        | No.101 | 0 | 65.3 a | 65.3 a  | 65.3 a  | 72.7 a | 72.7 a  | 72.7 a  | 64.7 a  | 64.7 a  | 64.7 a  |
|        |        | 2 | 66.0 a | 60.7 a  | 60.7 a  | 64.7 a | 68.0 ab | 67.0 ab | 66.0 a  | 60.7 ab | 59.3 a  |
|        |        | 4 | 66.0 a | 61.3 a  | 61.3 a  | 60.0 a | 55.3 b  | 58.7 bc | 63.0 a  | 62.7 a  | 65.3 a  |
|        |        | 6 | 58.7 a | 59.3 a  | 65.3 a  | 61.3 a | 63.3 ab | 50.7 c  | 63.3 a  | 57.3 ab | 60.7 a  |
|        |        | 8 | 57.3 a | 58.7 a  | 58.0 a  | 66.0 a | 57.3 ab | 53.3 bc | 43.3 a  | 56.7 b  | 45.3 a  |

Notes: Means associated with different letters in the same cultivar of each index denote the difference between storage duration of a storage condition at the 5% level according to the Tukey test.
